# Supplementary material for: Molecular Phylogeny and Description of the Novel Katablepharid Roombia truncata gen. et sp. nov., and Establishment of the Hacrobia Taxon nov
Source: PLoS One. 2009 Sep 17;4(9):e7080. doi: 10.1371/journal.pone.0007080 (PMC2741603; doi:10.1371/journal.pone.0007080)
Supplement: Table S2 — Accession numbers of the sequneces used in this study. Accession numbers of the sequences used in this study are shown. (0.12 MB XLS) [file pone.0007080.s002.xls]

## Sheet: Sheet1
	HSP90	LSU	SSU
Telonema subtile	CAJ87182
Telonema antarcticum	CAJ87184
Leucocryptos marina	ABJ80961, ABJ80959	DQ980471	AB193602
Guillardia theta	AAX10949 (nuclear), XP 001713499 (nucleomorph)	AF289037
Cyanophora paradoxa	BAF75926
Ostreococcus lucimarinus CCE9901	ABO98231
Pteroderma cristatum	ABJ80954
Arabidopsis thaliana	AAL49788
Capsicum chinense	BAG16518
Chlamydomonas reinhardtii	XP 001695264
Physcomitrella patens	XP 001777414
Physarum polycephalum	BAF75925|
Isochrysis galbana	AAX10942	ISL00000054
Pavlova lutheri	AAX10944		AY135218
Mesostigma viride	ABJ80948.
Goniomonas sp. ATCC 50108	AAP72158	AY752989
Mallomonas rasilis	AAX10943
Plectospira myriandra	AAX10947
Euglena gracilis	AAQ24862
Blastocladiella emersonii	ABH04243
Achlya ambisexualis	AAM90674
Goniomonas truncata	ABJ80946
Thraustotheca clavata	AAX10950
Entosiphon sulcatum	AAQ24862
Synura sphagnicola	ABJ80957
Naegleria gruberi	AAM93756
Opistophthalmus carinatus	AAQ94359
Chrysochromulina sp. NIES-1333	ABJ80934
Dictyostelium discoideum	XP 647482
Spodoptera frugiperda	AAG44630
Halteria grandinella	AAR27539
Rhynchopus sp. ATCC50230	AAM93744
Phytophthora palmivora	AAX10946
Blepharisma intermedium	AAR26656
Trypanosoma cruzi	XP 811791
Trimastix marina	ABC54648
Apis melifera	XP 395168
Tetraodon nigroviridis	CAG03540
Phaeodactylum tricornutum	AAX10945
Andalucia godoyi	ACA34533
Leishmania major	XP 001685759
Leishmania infantum	XP 001468119
Rhynchobodo ATCC50359	AAV66336
Pseudourostyla cristata	AAY67878
Laccaria bicolor	XP 001878264
Hemiselmis andersenii	XP 001712605	AM901321
Entamoeba histolytica	XP 653132
Cryptococcus neoformans	XP 568451
Monosiga brevicolis	AAP51213
Tetrahymena thermophila	XP 001009780
Coprinopsis cinerea	XP 001833710
Cryptosporidium parvum	XP 626924
Toxoplasma gondii	AAP44977
Karlodinium micrum	ABI14419
Crypthecodinium cohnii	AAM02974.
Reclinomonas americana	ABC54646
Cyanidioschyzon merolae	BAC67671
Babesia bovis	AAF61428
Thalassiosira pseudonana	XP 002291118
Raphidiophrys contractilis	dbj|BAF92012
Griffithsia japonica	AAC64932
Glaucocystis nostochinearum	BAF75927
Emiliania huxleyi	>jgi|Emihu1|443778|estExtDG fgenesh newKGs kg.C 2640009	scf 1402
Pterocystis tropica		AY752993
Prymnesium parvum		AJ876802
Goniomonas amphinema		EF681913
Cryptomonas paramecium		EF681911
Chroomonas coerulea		AM901343
Chroomonas pochmannii		AM901342
Hemiselmis virescens		AM901341
Hemiselmis UTEX2000		AM901340
Chroomonas sp. M2067		AM901338
Chroomonas sp. M1953		AM901337
Komma caudata		AM901329
Phaeocystis antarctica		AF289040
Pavlova viridis		DQ202388	DQ075201
Isochrysis zhangjiangensis		DQ202387
Chlamydaster sterni		EF681909
Pterocystis tropica		AY752993
Microheliozoan SvdH-2005		AY752992
Sphaerastrum fockii		|AY752991	AY749614
Pavlovales sp. CCMP2436			EU247835
Pavlova pingui			AB293551
Exanthemachrysis gayraliae			DQ531625
Corcontochrysis noctivaga			DQ207406
Umbilicosphaera hulburtiana			AM490993
Hymenomonas coronata			AM490982
Hymenomonas globosa			AM490981
Ochrosphaera verrucosa			AM490980
Pleurochrysis scherffelii			AM490978
Pleurochrysis placolithoides			AM490977
Chrysochromulina spinifera			AM491022
Chrysochromulina simplex			AM491021
Chrysochromulina parva			EU024987
Chrysochromulina rotalis			AM491025
Chrysochromulina chiton			AM491029
Chrysochromulina ericina			AM491030
Uncultured marine eukaryote clone EN351CTD040 20mN8			EU368039
Uncultured marine eukaryote clone EN351CTD040 4mN11			EU368038
Uncultured marine eukaryote clone EN351CTD039 30mN9			EU368037
Uncultured marine eukaryote clone OC413NSS Q086 15m			EU368036
Uncultured marine eukaryote clone OC413NSS Q040T1F 15m			EU368035
Uncultured marine eukaryote clone OC413NSS Q007 15m			EU368034
Uncultured marine eukaryote clone OC413BATS P082 15m			EU368033
Uncultured marine eukaryote clone OC413BATS P006 15m			EU368032
Uncultured marine eukaryote clone OC413BATS O043 75m			EU368031
Uncultured marine eukaryote clone FS14M021 08Dec05 58m			EU368030
Uncultured marine eukaryote clone FS14M008 08Dec05 58m			EU368029
Uncultured marine eukaryote clone FS14K025 31Jul05 5m			EU368028
Uncultured marine eukaryote clone FSK017 31Jul05 5m			EU368027
Uncultured marine eukaryote clone FS14JA65 30Mar05 5m			EU368026
Uncultured marine eukaryote clone FS14JA72 30Mar05 5m			EU368025
Uncultured marine eukaryote clone FS14I060 30Mar05 70m			EU368024
Uncultured marine eukaryote clone FS04H153 01Aug05 89m			EU368023
Uncultured marine eukaryote clone FS04H169 01Aug05 89m			EU368022
Uncultured marine eukaryote clone FS04GA46 01Aug05 5m			EU368021
Uncultured marine eukaryote clone FS04GA95 01Aug05 5m			EU368020
Uncultured marine eukaryote clone FS04G188 01Aug05 5m			EU368019
Uncultured marine eukaryote clone FS04G190 01Aug05 5m			EU368018
Uncultured marine eukaryote clone FS04E037 31Mar05 5m			EU368017
Uncultured marine eukaryote clone FS04E081 31Mar05 5m			EU368016
Uncultured marine eukaryote clone FS01D057 01Aug05 65m			EU368015
Uncultured marine eukaryote clone FS01D065 01Aug05 65m			EU368014
Uncultured marine eukaryote clone FS01D014 01Aug05 65m			EU368013
Uncultured marine eukaryote clone FS01D031 01Aug05 65m			EU368012
Uncultured marine eukaryote clone FS01D022 01Aug05 65m			EU368011
Uncultured marine eukaryote clone FS01D054 01Aug05 65m			EU368010
Uncultured marine eukaryote clone FS01C040 30Mar05 70m			EU368009
Uncultured marine eukaryote clone FS01B048 30Mar05 5m			EU368008
Uncultured marine eukaryote clone FS01B026 30Mar05 5m			EU368007
Uncultured marine eukaryote clone FS01B029 30Mar05 5m			EU368006
Uncultured marine eukaryote clone FS01B033 30Mar05 5m			EU368005
Uncultured marine eukaryote clone FS01AA94 01Aug05 5m			EU368004
Uncultured marine eukaryote clone FS01AA11 01Aug05 5m			EU368003
Cryptomonas sp. borealis			AJ420696
Cryptomonas ovata			AJ420695
Chroomonas sp. M1703			AJ420699
Chroomonas sp. SAG B980-1			AJ420698
Cryptomonas sp. M0739			AJ420697
Campylomonas pyrenoidifera			AJ421150, AJ421147
Cryptomonas gyropyrenoidosa			AJ421149
Rhodomonas sp. M1630			AJ421148
Goniomonas sp. SH-9			AY705740
Goniomonas sp. SH-8			AY705739
Goniomonas amphinema			AY705738
Goniomonas sp. SH-6			AY360460
Goniomonas sp. SH-5			AY360459
Goniomonas sp. SH-4			AY360458
Goniomonas sp. SH-3			AY360457
Goniomonas sp. SH-2			AY360456
Goniomonas sp. SH-1			AY360455
Goniomonas sp. ATCC 50108			AY360454
Goniomonas pacifica			AF508277
Uncultured eukaryote clone ENI47296.00145			AY938299
Uncultured eukaryote clone ENI42482.00159			AY938049
Uncultured marine eukaryote clone BL010625.24			AY426929
Uncultured marine eukaryote clone BL000921.34			AY426851
Katablepharis japonica			AB231617
Uncultured freshwater eukaryote clone LG04-01			AY919689
Uncultured eukaryotic picoplankton clone PG5.31			AY642732
Uncultured kathablepharid clone CH1 5A 4			AY821954
Kathablepharis remigera			AY919672
Uncultured Telonema clone BLENRD2T4 12			EU785298
Uncultured Telonema clone BLENRL2T4 13			EU785276
Uncultured Telonema clone RA1-H4			EU785099
Uncultured Telonema clone IND31.100			AM418563
Uncultured Telonema clone 33.54			AM418562
Telonema subtilis isolate RCC358.7			AJ564772
Telonema subtilis isolate RCC404.5			AJ564771
Uncultured eukaryote clone BL010625.25			AJ564770
Uncultured eukaryote clone RA001219.10			AJ564769
Uncultured eukaryote clone RA000412.136			AJ564768
Uncultured eukaryote clone RA010412.17			AJ564767
Telonema antarcticum			AJ564773
Uncultured centroheliozoan clone EB17.116			EU143988
Raphidiophrys ambigua			AF534708
Chlamydaster sterni			AF534709
Heterophrys marina			AF534710
Pterocystis sp. JJP-2003			AY268043
Uncultured centroheliozoan clone CV1_B2_46			AY821944
Pterocystis foliacea isolate AB			AY749599
Choanocystis sp. Oxford			AY749605
Raineriophrys sp. Oxford1			AY749606
Pterocystis sp. Devon			AY749604
Pterocystis sp. NZ			AY749610
Choanocystis sp. Waikato			AY749617
Polyplacocystis symmetrica			AY749618
Choanocystis rotundata			AY749616
Acanthocystis sp. Hinksey Lake			AY749629
Raineriophrys erinaceoides			AY749633
